# Supplementary material for: Cobalt Oxide on a Nanoporous TUD-1 Catalyst for Methylene Blue Dye Interaction DFT Studies and Degradation
Source: MDPI journal article supplement (doi:10.3390/sym13091754), 2021-09-20
Supplement: s1 [file s1]

## Supplementary information

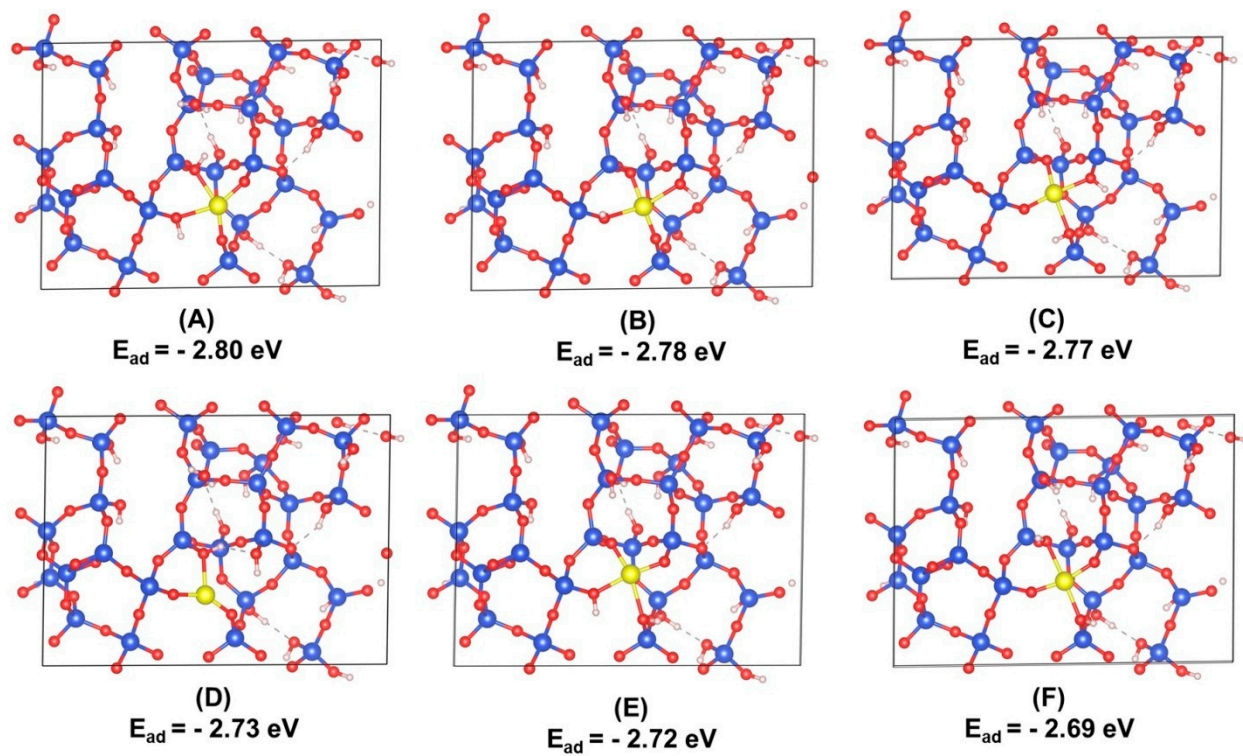

**Figure S1.** Different adsorption configuration of Co@am-SiO<sub>2</sub>. The blue red and yellow spheres represent Si, O and Co, respectively.
